# Supplementary material for: A new insight into the chemical degradation of proton exchange membranes in water electrolyzers
Source: Royal Society of Chemistry journal article supplement (doi:10.1039/d3ta05224a), 2024-01-01
Supplement: d3ta05224a1.pdf [file d3ta05224a1.pdf]

# A new insight into the chemical degradation of proton exchange membrane in water electrolyzer

Zhiyan Rui<sup>1</sup>, Kang Hua<sup>1</sup>, Zhenlan Dou<sup>3</sup>, Aidong Tan<sup>2</sup>, Chunyan Zhang<sup>3</sup>, Xiaoyun Shi<sup>2</sup>, Rui Ding<sup>1</sup>,  
Xiaoke Li<sup>1</sup>, Xiao Duan<sup>1</sup>, Yongkang Wu<sup>1</sup>, Yipeng Zhang<sup>2</sup>, Xuebin Wang<sup>1</sup>, Jia Li<sup>2\*</sup> and Jianguo Liu<sup>2\*</sup>

*1. National Laboratory of Solid State Microstructures, College of Engineering and Applied  
Sciences, and Collaborative Innovation Center of Advanced Microstructures, Nanjing University,  
22 Hankou Road, Nanjing, Jiangsu Province, 210093, People's Republic of China*

*2. Institute of Energy Power Innovation, North China Electric Power University, 2 Beinong Road,  
Beijing, 102206, People's Republic of China*

*3. State Grid Shanghai Municipal Electric Power Company, 1122 Yuanshen Road, Shanghai,  
200233, People's Republic of China*

\*. corresponding author

## PEMWE modelling

The major parameters covered in the modelling process is listed in table S1. The modelling was performed in COMSOL Multiphysics 6.1.

**Polarization curve modelling:** The relationship between current density and potential within PTL, GDL and PEM followed the ohm's law (formula 1 and 2):

$$\nabla \cdot i = 0$$

$$i = -\sigma \nabla \varphi$$

where  $i$  is the current density,  $\varphi$  is the potential and  $\sigma$  is the conductivity of each material. For PEM,  $\sigma_{mem}$  can be calculated via formula 3 and 4:

$$\sigma_{mem}(T) = \sigma_{303} \exp\left[\frac{1268}{303} \left(\frac{1}{303} - \frac{1}{T}\right)\right]$$

$$\sigma_{303} = 0.5139\lambda - 0.326$$

where  $T$  is the temperature,  $\sigma_{303}$  is the proton conductivity at 303 K,  $T$  is the temperature and  $\lambda$  is the water content in the membrane.

The electrochemical polarization was interpreted as Butler-Volmer equation for both cathodic and anodic reactions:

$$i_j = i_{0,j} \gamma_j \left[ \exp\left(\frac{\alpha_j z F \eta_j}{RT}\right) - \exp\left(-\frac{(1-\alpha_j) z F \eta_j}{RT}\right) \right]$$

where  $j$  is an for anodic side and  $ca$  for cathodic side,  $i_j$  is the current density,  $i_{0,j}$  is the exchange current density,  $\gamma_j$  is the active specific surface area,  $\alpha_j$  is the charge transfer coefficient,  $z$  is the number of transferred electrons,  $F$  is the Faraday's constant,  $R$  is the gas constant and  $\eta_j$  is the overpotential. Herein,  $\gamma_{an}$  and  $\gamma_{ca}$  was calculated from the measured electrochemical specific surface area of both anodic and cathodic catalysts. The exchange current density can be acquired using the following formula:

$$i_{0,j} = z F k_j T \exp\left(-\frac{A_j}{RT}\right)$$

where  $k_j$  is the rate parameter and  $A_j$  is the activation energy.

**Cathodic oxygen concentration modelling:** The gas permeation process in this model includes the dissolution of gases, diffusion and convection. The governing equation is as follow:

$$v_{H_2O} \cdot \nabla c_i = \nabla \cdot D_i \nabla c_i$$

$v_{H_2O}$  can calculated from the following equation:

$$v_{H_2O} = (-0.332 \log i + 5.59) \frac{M_{H_2O} i}{2F \rho_{H_2O}}$$

where  $M_{H_2O}$  is the molar mass of  $H_2O$  and  $\rho_{H_2O}$  is the density of  $H_2O$ .

The solubility and diffusion coefficient of both  $H_2$  and  $O_2$  can be calculated from formula 9-12:

$$S_{H_2} = \frac{1}{1.09\lambda \times \frac{M_{H_2O}}{EW} \times 10^5 \exp\left(\frac{77}{T}\right)}$$

$$S_{O_2} = 1.62 \times 10^{-6} \exp\left(\frac{603}{T}\right)$$

$$D_{H_2} = 1.23 \times 10^{-6} \exp\left(-\frac{2602}{T}\right)$$

$$D_{O_2} = 4.2 \times 10^{-6} \exp\left(-\frac{18380}{RT}\right)$$

The gas concentration can be calculated from Henry's law:

$$c_i = S_i P_i$$

where  $P_i$  is the partial pressure of specie  $i$ .

For the modelling of cathodic oxygen concentration, a steady-state calculation was performed.

The mass balance for both hydrogen and oxygen in cathodic side can be referred to as followed:

$$j_{O_2}^{perm} - j_{O_2}^{react} - j_{O_2}^g - j_{O_2}^\omega = 0$$

$$-j_{H_2}^{perm} + S_{H_2} - j_{H_2}^g - j_{H_2}^\omega = 0$$

where  $-j_i^{perm}$  is the permeation flux through the membrane of specie  $i$ ,  $j_i^{react}$  is the reaction consumption,  $j_i^g$  is the gaseous flow leaving the cell,  $j_i^\omega$  is the dissolution flux and  $S_{H_2}$  is the hydrogen generation rate in cathode side. The oxygen concentration in cathode can be calculated from:

$$x_{O_2} = \frac{j_{O_2}^g}{j_{O_2}^g + j_{H_2}^g}$$

**Membrane degradation modelling:** The cathodic  $H_2O_2$  formation rate ( $r_{ca}^{H_2O_2}$ ) was modelled as follow:

$$r_{ca}^{H_2O_2} = k_1 c_{O_2} c_{H^+}^2$$

while the anodic  $H_2O_2$  formation rate was denoted as  $r_{an}^{H_2O_2}$ , where  $k_1$  is the rate constant of reaction

1.  $c_{H^+}$  can be calculated from formula 18:

$$c_{H^+} = \frac{\rho_{mem}}{EW} = \frac{1980 + 32.4\lambda}{(1 + 0.00648\lambda)EW}$$

where  $\rho_{mem}$  is the humidity-dependent density of PEM and EW is the equivalent weight of PEM.

Further, both cathodic and anodic  $H_2O_2$  was consumed via the first step of Fenton's reaction (reaction 2) to form hydroxyl radicals, and the reaction rate was modelled as formula 19:

$$r_{HO\cdot} = k_2 c_{H_2O_2} c_{Fe^{2+}} + c_{H^+}^2$$

where  $k_2$  is the rate constant of reaction 2 and  $c_{Fe^{2+}}$  was estimated to be 10 ppm. Finally, the chemical degradation of PEM ionomer was modelled as formula 20:

$$r_{F^-} = k_3 c_{HO\cdot}$$

where  $k_3$  is the estimated rate constant of membrane degradation reaction induced by  $HO\cdot$  radicals.

The mass transfer within the PEM follows formula 21:

$$v_{H_2O} \cdot \nabla c_i = \nabla \cdot D_i \nabla c_i$$

where  $v_{H_2O}$  is the electroosmotic velocity,  $D_i$  and  $c_i$  is the diffusion coefficient and concentration of specie  $i$ ,  $i$  can be  $H_2O_2$ ,  $HO\cdot$  and  $F^-$ . The diffusion coefficient of  $F^-$  ions in Nafion 115 was approximately to be that in water, and the value is about  $1 \times 10^{-8} \text{ m}^2 \text{ s}^{-1}$ .

The transfer of hydroxyl radicals was ignored due to the extremely short dwell time. For the steady-state investigation, a mass balance was written on both cathode side and anode side for  $H_2O_2$ , hydroxyl radicals and  $F^-$  ions, shown as equation 22-24, where  $j_i^{gene}$  is the generating rate of specie  $i$ ,  $j_i^{cons}$  is the consumption rate of specie  $i$  through chemical reactions,  $j_i^{perm}$  is the transfer flux through the membrane and  $j_i^{effl}$  is the effluent flux out from the cell. All the variates in equation 17-19 is inward flux, namely the value is negative when specie  $i$  is a net outflow. The final FRR can be determined by  $j_F^{effl}$  in both cathode and anode.

$$j_{H_2O_2}^{gene} + j_{H_2O_2}^{cons} + j_{H_2O_2}^{perm} + j_{H_2O_2}^{effl} = 0$$

$$j_{HO\cdot}^{gene} + j_{HO\cdot}^{cons} + j_{HO\cdot}^{effl} = 0$$

$$j_F^{gene} + j_F^{perm} + j_F^{effl} = 0$$

Table S1: Major parameters covered in the modelling process

| Parameter                                                 | Symbol                     | Value                                                                  | Reference |
|-----------------------------------------------------------|----------------------------|------------------------------------------------------------------------|-----------|
| Thickness of anodic PTL                                   | $t_{an}$                   | 250 $\mu\text{m}$                                                      | /         |
| Thickness of cathodic GDL                                 | $t_{ca}$                   | 250 $\mu\text{m}$                                                      | /         |
| Thickness of PEM                                          | $t_{mem}$                  | 127 $\mu\text{m}$                                                      | /         |
| Conductivity of PTL                                       | $\sigma_{an}$              | 13,700 $\text{S m}^{-1}$                                               | /         |
| Conductivity of GDL                                       | $\sigma_{ca}$              | 120 $\text{S m}^{-1}$                                                  | /         |
| Anodic active specific surface area                       | $\gamma_{an}$              | $1.60 \times 10^9 \text{ m}^{-1}$                                      | /         |
| Cathodic active specific surface area                     | $\gamma_{ca}$              | $7.06 \times 10^7 \text{ m}^{-1}$                                      | /         |
| Anodic charge transfer coefficient                        | $\alpha_{an}$              | 0.65                                                                   | 1         |
| Cathodic charge transfer coefficient                      | $\alpha_{ca}$              | 0.51                                                                   | 1         |
| Faraday's constant                                        | F                          | 96,485 $\text{C mol}^{-1}$                                             | /         |
| Gas constant                                              | R                          | 8.314 $\text{J K}^{-1} \text{ mol}^{-1}$                               | /         |
| Anodic activation energy                                  | $A_{an}$                   | 62,836 $\text{J mol}^{-1}$                                             | 1         |
| Cathodic activation energy                                | $A_{ca}$                   | 24,359 $\text{J mol}^{-1}$                                             | 1         |
| Anodic rate parameter                                     | $k_{an}$                   | $4.63 \times 10^{-3} \text{ mol K}^{-1} \text{ s}^{-1} \text{ m}^{-2}$ | 1         |
| Cathodic rate parameter                                   | $k_{ca}$                   | 0.01 $\text{mol K}^{-1} \text{ s}^{-1} \text{ m}^{-2}$                 | 1         |
| Number of water molecules per sulfonate site              | $\lambda$                  | 16                                                                     | 2         |
| Equivalent weight of Nafion 115                           | EW                         | 1100 $\text{g mol}^{-1}$                                               | 3         |
| Diffusion coefficient of $\text{H}_2\text{O}_2$           | $D_{\text{H}_2\text{O}_2}$ | $2.4 \times 10^{-11} \text{ m}^2 \text{ s}^{-1}$                       | 4         |
| Diffusion coefficient of $\text{F}^+$ ions                | $D_{\text{F}}$             | $1 \times 10^{-8} \text{ m}^2 \text{ s}^{-1}$                          | /         |
| $\text{Fe}^{2+}$ concentration                            | $c_{\text{Fe}^{2+}}$       | 10 ppm                                                                 | /         |
| Rate constant of cathodic $\text{H}_2\text{O}_2$ yielding | $k_1$                      | $4.09 \times 10^{-9} \text{ m}^6 \text{ mol}^{-2} \text{ s}^{-1}$      | 5         |
| Rate constant of first step of Fenton's reaction          | $k_2$                      | $4.18 \times 10^6 \text{ m}^9 \text{ mol}^{-3} \text{ s}^{-1}$         | 6         |
| Rate constant of PEM degradation                          | $k_3$                      | $4 \times 10^6 \text{ s}^{-1}$                                         | 1,7       |

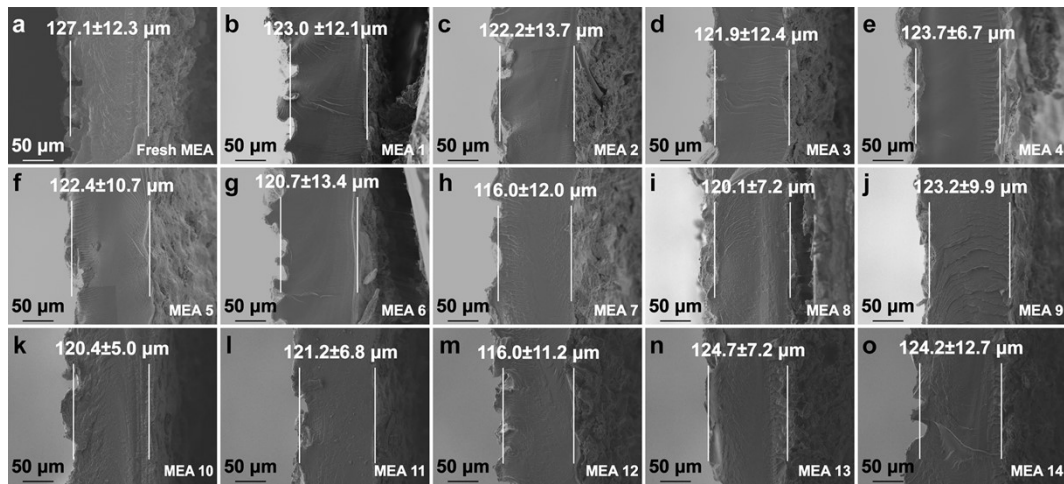

Figure S1. SEM cross-sectional image of fresh Nafion115 based MEA (a) and degraded MEAs after different testing conditions (b-o).

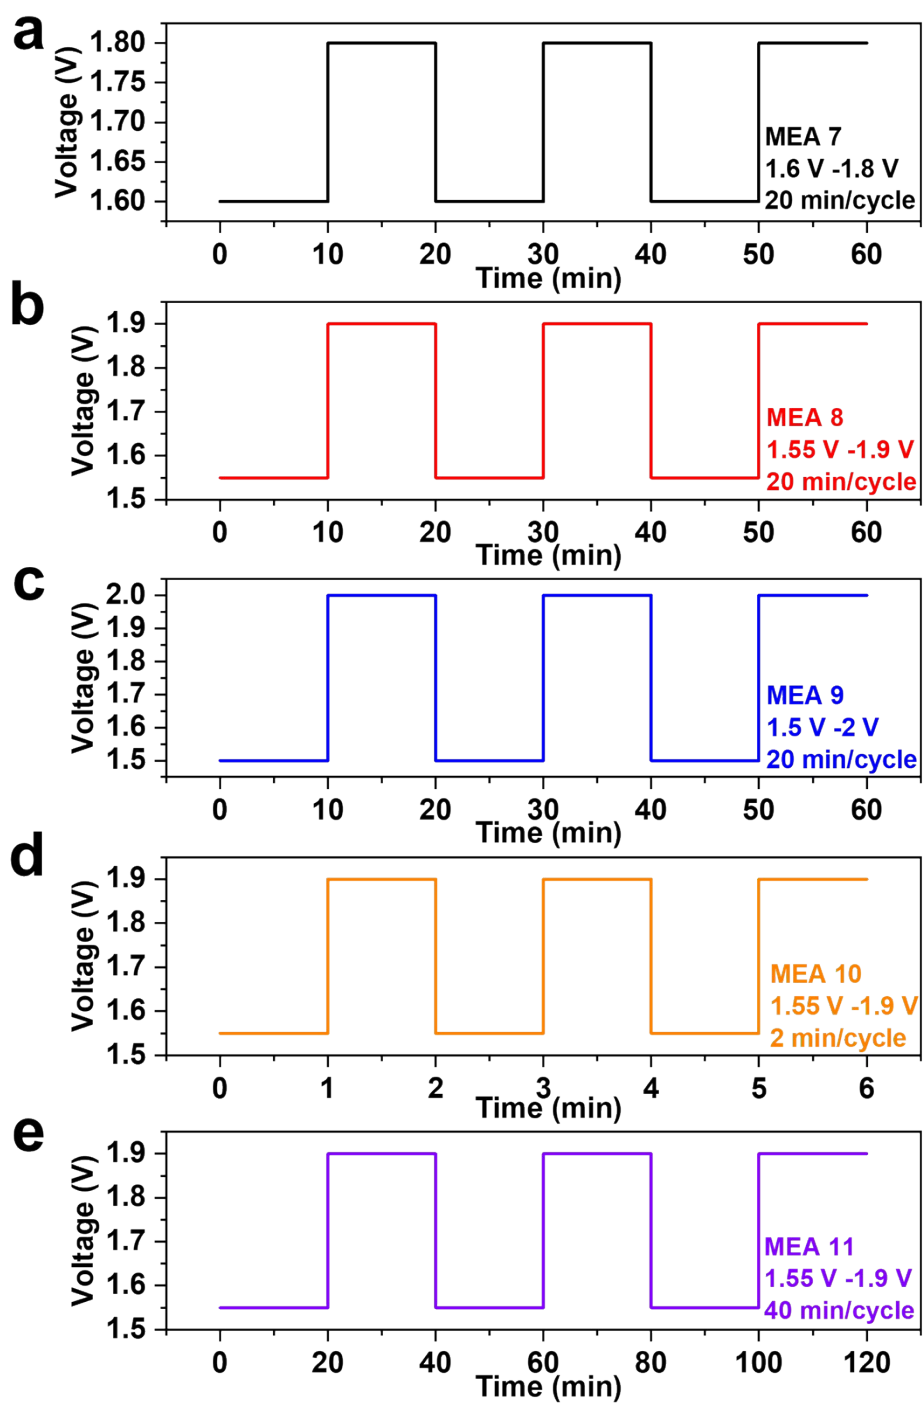

Figure S2. Power supply profile of the fluctuant voltage durability tests for MEA 7-11.

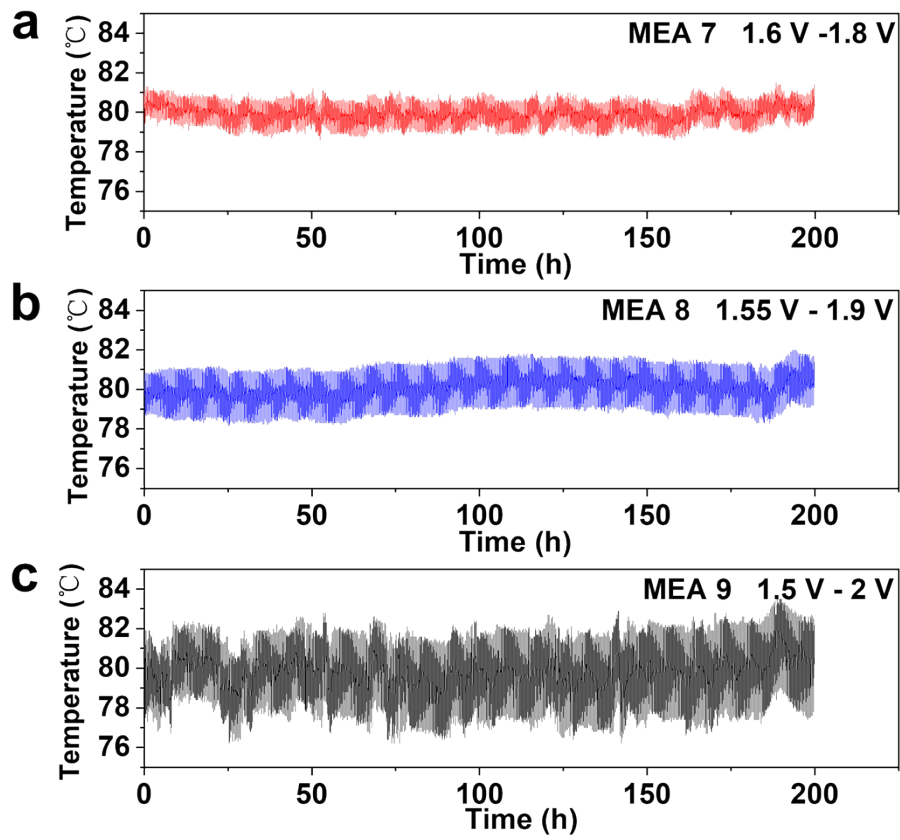

Figure S3. Temperature as a function of testing time under fluctuant voltage tests with voltage range of (a) 1.6 V - 1.8 V (MEA 7), (b) 1.55 V - 1.9 V (MEA 8), (c) 1.5 V - 2 V (MEA 9).



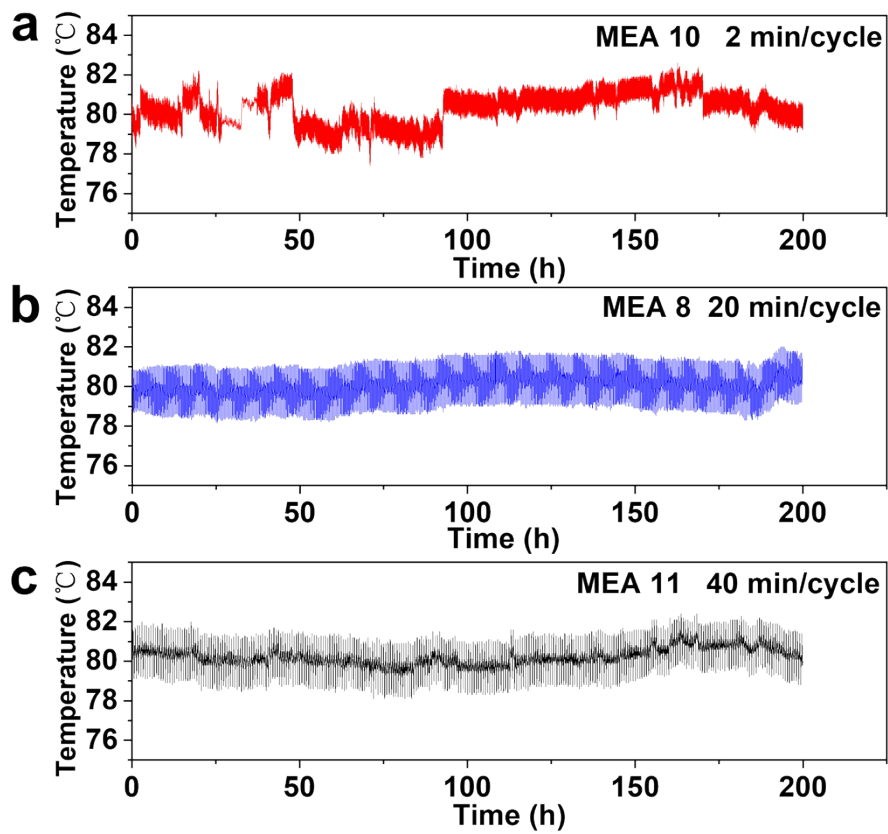

Figure S4. Temperature as a function of testing time under fluctuant voltage tests with period of (a) 2 min/cycle (MEA 10), (b) 20 min/cycle (MEA8) and (c) 40 min/cycle (MEA 11).

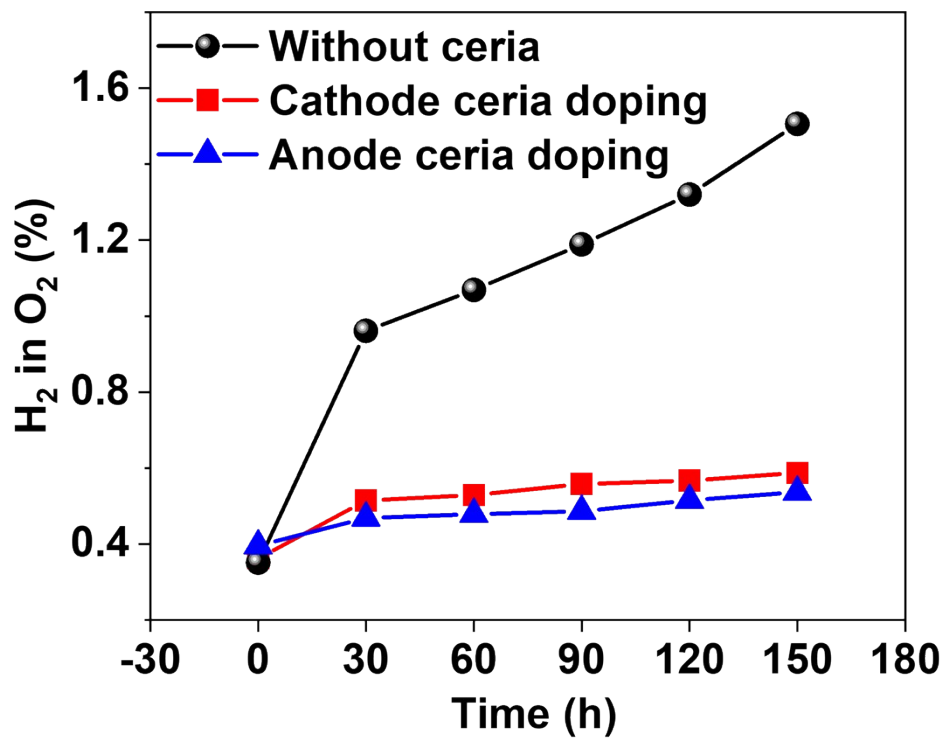

Figure S5. Anode H<sub>2</sub> concentration recorded during the 1.8 V steady state durability tests for MEA 12-14.

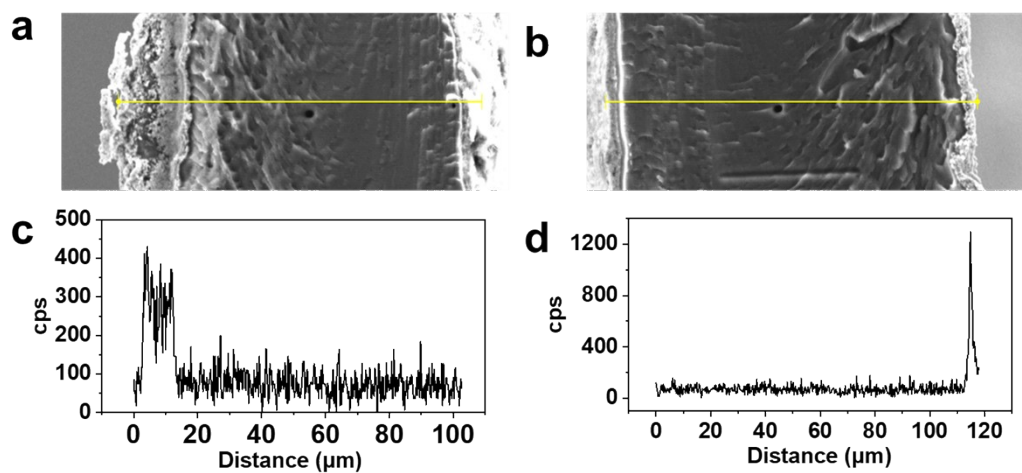

Figure S6. (a) SEM cross-sectional image and (c) EDS line scan spectrum of Ce for the cathodic ceria doped MEA after durability test; (b) SEM cross-sectional image and (d) EDS line scan spectrum of Ce for the anodic ceria doped MEA after durability test.

## Reference

1. M. Chandesris, V. Médeau, N. Guillet, S. Chelghoum, D. Thoby and F. Fouda-Onana, *International Journal of Hydrogen Energy*, 2015, **40**, 1353-1366.
2. H. Ito, T. Maeda, A. Nakano and H. Takenaka, *International Journal of Hydrogen Energy*, 2011, **36**, 10527-10540.
3. K. A. Mauritz and R. B. Moore, *Chemical Reviews*, 2004, **104**, 4535-4585.
4. S. Wang, *Hydrogen Peroxide diffusion Coefficients in Nafion, p-Phenylenediamine and Crosslinked Choline Oxidase Films*, 2018.
5. V. A. Sethuraman, J. W. Weidner, A. T. Haug, S. Motupally and L. V. Protsailo, *Journal of the Electrochemical Society*, 2008, **155**, B50-B57.
6. T. Rigg, W. Taylor and J. Weiss, *Journal of Chemical Physics*, 1954, **22**, 575-577.
7. K. H. Wong and E. Kjeang, *Journal of the Electrochemical Society*, 2014, **161**, F823-F832.
